# Supplementary material
Source: Research Square preprint supplement (doi:10.21203/rs.3.rs-9003742/v1)
Supplement: Supplementary file 1 [file bff19599285cf622c6b4a534.docx]

**SWW Method® Study Intake Form: Part II ~ questions were uploaded into typeform and answers were populated into a private google sheets document which only the PI had access to.**

First Name: ___________________________ Last Name: _________________________

Date of Birth: _________________________ Age: ________ Height: ________ Weight: ______

Email: ______________________________________________

Phone number: _______________________________________

_____________________________________________________________________________________

GI HEALTH:

Describe your GI health:

How often do you have a bowel movement?

Describe your bowel consistency:

_____________________________________________________________________________________

ENERGY + SLEEP

AM Energy: Rate your energy (on a scale of 1-10) when you first wake up in the morning. 1 being extremely low and difficult to wake up, 10 being amazing / high energy: _____

DAY Energy: Rate your energy (on a scale of 1-10) throughout the day. 1 being extremely low, 10 being high energy: _____

SLEEP:

On average how many hours of sleep per night: _____

How often do you wake up throughout the night: _____

ANXIETY: Rate your anxiety (on a scale of 1-10) – 1 being very low anxiety – never stressed, 10 being high anxiety / difficult to calm: _____

Describe how the above have changed since being enrolled in the SWW Method™:

__________________________________________________________________________________

DIETARY INTAKE:

Please list below any supplements you are currently taking:

How many ounces of water do you consume on average, daily? ___________

Do you drink coffee? YES / NO

If so, how many cups of coffee do you drink per day? ________

Do you consume any other caffeinated beverages? YES / NO

If so, what forms and how frequently? ______________________________________________________

Do you drink alcoholic beverages? YES / NO

If so, how many drinks per week? ________

Outside of water, alcohol and coffee, list any other beverages you consume:

Which of the following oils do you consume? Please check all that apply.

- Butter
- Tallow
- Ghee
- Coconut oil
- Avocado oil
- Olive oil
- Vegetable oil
- Canola oil
- Soybean oil
- Sunflower seed oil
- Safflower oil
- Peanut oil

How often do you consume refined sugar or sugar-containing foods?

- 2x/day
- 1x/day
- 3-5x/week
- 1-2x/week
- Never

How often do you consume non-starchy vegetables (greens, cruciferous vegetables, summer squashes)?

- With every meal
- Once a day
- 3-5x/week
- 1-2x/week
- Never

How often do you consume a meat product?

- With every meal
- Once a day
- 3-5x/week
- 1-2x/week
- Never

How often do you consume eggs?

- With every meal
- Once a day
- 3-5x/week
- 1-2x/week
- Never

How often do you consume dairy products?

- With every meal
- Once a day
- 3-5x/week
- 1-2x/week
- Never

How often do you consume bread / gluten-containing products?

- With every meal
- Once a day
- 3-5x/week
- 1-2x/week
- Never

Please describe your normal daily food intake below (include breakfast, lunch and dinner and snacks):

Have you ever followed any extreme dietary protocols? If so, please describe below:

_________________________________________________________________________________

EXERCISE:

How often do you implement cardiovascular exercise into your routine:

- 60+ minutes per day
- 30 minutes per day
- 3-5x/week
- 1-2x/week
- Never

How often do you implement weight training into your routine:

- 60+ minutes per day
- 30 minutes per day
- 3-5x/week
- 1-2x/week
- Never

Please describe what type of training you typically integrate throughout the week:

_____________________________________________________________________________________

*Thank you so much for taking the time to complete this form. The principal investigator of the study will be in touch with you regarding next steps. If you have any questions please contact Megan Grover.*
